# Supplementary material for: Structure and dynamics of copper complexes with 2,2′:6′,2″-terpyridines in glassy matrices
Source: Royal Society of Chemistry journal article supplement (doi:10.1039/b305764j), 2003-01-01
Supplement: b305764j-esi.doc [file b305764j-esi.doc]

# Structure and Dynamics of Copper Complexes with 2,2':6',2''-Terpyridines in Glassy Matrices

# Supporting Information

E. Narr,a H. Zimmermann,b A. Godt,a D. Goldfarb,c G. Jeschke*a

a Max Planck Institute for Polymer Research, Postfach 3148, 55021 Mainz, Germany. Fax: +49-6131-379-100; Tel: +49-6131-379-126; E-mail: jeschke@mpip-mainz.mpg.de

b Max Planck Institute for Medical Research, Jahnstrase 29, 69120 Heidelberg, Germany.

c Department of Chemical Physics, Weizmann Institute of Science, 76100 Rehovot, Israel.

**Synthesis of the ligands 1-3.**

**Perdeuterated terpyridine (tpy-d11) and**

**6,6'-Dideutero-2,2':6',2''-terpyridine (tpy-d2, 1)**

We found that 2,2’:6’,2’’-terpyridine can be perdeuterated by exchange in D2O with platinum on carbon (10%) as catalyst at 210 °C within 48 hours. Selectively deuterated tpy‑d2 **1** was prepared by stirring terpyridine in D2O in a sealed glass tube at 240 °C without catalyst. The glass tube, which was filled with D2O to one third of the total volume, was kept for 40 hours in a stainless-steel high-pressure vessel with H2O to equalise pressure. After slow cooling of the pressure vessel, the precipitated terpyridine was isolated and purified by column chromatography (alumina, CH2Cl2/diethyl ether 7:3). The EI-MS spectrum is in agreement with the structure of **1**. 1H NMR (CDCl3): ** = 8.64 (dd, 2H, *J* = 8.0 Hz, *J* = 1.0 Hz, H-3, H-3''), 8.48 (d, 2H, *J* = 7.9 Hz, H-3', H-5), 7.96 (dd, 1H, *J* = 7.9 Hz, H-4'), 7.86 (dd, 2H, *J* = 8.0 Hz, *J* = 7.5 Hz, H-4, H-4''), 7.33 (dd, 2H, *J* = 7.5 Hz, *J* = 1.0 Hz, broadened by unresolved deuterium coupling, H-5, H-5''); 13C NMR (CDCl3): ** = 156.3, 155.4, 148.8 (t, *J* = 25 Hz), 137.9, 136.9, 123.6, 121.2, 121.1.

**Scheme 1.** (a) CuI, Pd(PPh3)2Cl2, *i*Pr2NH, THF, air; (b) CuI, Pd(PPh3)2Cl2, *i*Pr2NH, THF.

# 4'-Ethynyl-2,2':6',2''-terpyridine:[1] To a degassed solution of 4-(trifluoromethyl­sulfonyloxy)-2,2:6,2-terpyridine (4.00 g, 10.5 mmol) and trimethylsilylacetylene (2.4 mL, 17 mmol) in dry diisopropylamine (50 mL) und dry THF (110 mL) were added CuI (0.46 g, 2.41 mmol) and Pd(PPh3)2Cl2 (0.46 g, 0.66 mmol). After stirring the reaction mixture for 3 h at room temperature (with increasing time the amount of an unidentified byproduct increased), the solvent was removed under reduced pressure, the residue was suspended in CH2Cl2 (20 mL) and filtered through neutral Al2O3 using CH2Cl2 (ca. 200 mL) as the eluent. Removal of the solvent gave impure 4'-[2-(trimethylsilyl)ethynyl]-2,2':6',2''-terpyridine (3.4 g) as a brown solid. This solid was dissolved in THF (25 mL) and methanol (35 mL). Potassium fluoride (0.66 g, 11.4 mmol) was added and the reaction mixture was stirred for 24 h at room temperature. Addition of conc. HCl (2 mL) precipitated the product. The brownish precipitate was isolated, washed with diethyl ether and finally dissolved in a mixture of THF (300 mL) and saturated aqueous KOH (100 mL). This solution was extracted with diethyl ether. The combined organic phases were dried (MgSO4) and the solvent was removed to give 4'-ethynyl-2,2':6',2''-terpyridine (1.5 g, 56%) as a brownish solid.

**1,4-Di(2,2':6',2''-terpyrid-4'-yl)butadiyne (2)**:[1] A solution of 4'-ethynyl-2,2':6',2''-terpyridine (509 mg, 1.95 mmol) in THF (20 ml) was stirred at air for 30 min. Then CuI (60 mg, 0.31 mmol) and Pd(PPh3)2Cl2 (60 mg, 0.09 mmol) and diisopropylamine (10 mL) were added.[2] After stirring the reaction mixture for 3 h in an open flask, the solvent was removed under reduced pressure and the residue was dissolved in a mixture of THF (20 mL), diethyl eher (50 mL) and water. The organic phase was washed several times with water, dried (MgSO4) and the solvent was removed. Flash chromatography (SiO2, petroleum ether/diethyl ether  diethyl ether/THF 1:2; It took a large amount of solvent to elute the compound!) gave **2** as a yellowish solid (104 mg, 20%). The low yield is probably due to the low solubility of the product. Single crystals for X-ray structure analysis were obtained from C2H2Cl4/ethanol. M.p. 298 oC decomposition; 1H NMR (C2D2Cl4, 80 °C): ** = 8.68 (d with fine structure, *J* = 4.6 Hz, 4H, tpy: H-6, H-6), 8.56 (s, 4H, tpy: H-3', H-5'), 8.53 (d, 4H, *J* = 8.0 Hz, tpy: H-3, H-3''), 7.82 (ddd, *J* = 7.7 Hz, *J* = 7.7 Hz, *J* = 1.7 Hz, tpy: H-4, H-4''), 7.31 (ddd, *J* = 7.5 Hz, *J* = 4.9 Hz, *J* = 0.9 Hz, tpy: H-5, H-5''); 13C NMR (C2D2Cl4, 80 °C): ** = 156.2, 155.8, 149.6, 137.1, 131.7, 124.3, 123.8, 121.5, 81.5, 77.6; FD-MS: *m/z* = 512.2 (100%, M+), 255.9 (10%, M2+); calcd for C34H20N6: 512.57.

**2,5-Dihexyl-1,4-di[2-(2,2':6',2''-terpyrid-4'-yl)ethynyl]-benzene (3):**[3] To a degassed solution of 4'-ethynyl-2,2':6',2''-terpyridine (510 mg, 1.98 mmol) and 1,4-dihexyl-2,5-diiodobenzene[4] (326 mg, 0.65 mmol) in dry THF (20 mL) and dry diisopropylamine (10 mL) were added CuI (98 mg, 0.51 mmol) and Pd(PPh3)2Cl2 (96 mg, 0.14 mmol). The reaction mixture was stirred for 3 h at room temperature. The solvent was removed under reduced pressure and the residue was dissolved in a mixture of THF (20 mL), diethyl ether (40 mL) and water. The organic phase was washed several times with water. Then conc. HCl (2 mL) were added to the organic phase whereupon a precipitate was formed. This was isolated, washed with diethyl ether and then dissolved in a mixture of THF (100 mL) and saturated aqueous KOH (20 mL). The obtained solution was extracted with diethyl ether. The combined organic phases were dried (MgSO4) and the solvent was removed. Flash chromatography (SiO2; petroleum ether/diethyl ether 6:1  1:2; A large amount of solvent was required.) gave **3** (226 mg, 46%) as a colorless solid. Single crystals for X-ray structure analysis were obtained from CH2Cl2/ethanol. M.p.: 244 °C; 1H NMR (CD2Cl2, room temperature): ** = 8.72 (d with fine structure, *J* = 4.7 Hz, 4H, tpy: H-6, H-6''), 8.62 (d, *J* = 7.9 Hz, 4H, tpy: H-3, H-3''), 8.60 (s, 4H, tpy: H-3', H-5'), 7.90 (ddd, *J* = 7.7 Hz, *J* = 7.7 Hz, *J* = 1.7 Hz, 4H, tpy: H-4, H-4''), 7.51 (s, 2H, Ar-H), 7.38 (ddd, *J* = 7.4 Hz, *J* = 4.8 Hz, *J* = 1.0 Hz, 4H, H-5, H-5''), 2.92 (t, *J* = 7.8 Hz, 4H, ArCH2), 1.78 (m, 4H, CH2), 1.55-1.25 (m, 12H, CH2), 0.89 (t, *J* = 7.1 Hz, 6H, CH3); 13C NMR (CDCl3, room temperature): ** = 155.8, 155.7, 149.2, 142.8, 136.8, 133.5, 133.0, 124.0, 122.8, 121.6, 122.6, 92.7, 92.3, 34.0, 31.8, 30.6, 29.2, 22.6, 14.1; FD-MS: *m/z* = 756.6 (100%, M+), 378.5 (8%, M2+); elemental analysis (%) calcd for C52H48N6 (756.99): C 82.51, H 6.39, N 11.10; found C 82.15, H 6.30, N 10.70; FD-MS: *m/z* = 756.6 (100%, M+), 378.5 (8%, M2+).

## References

[1] Differing procedures have been published: V. Grosshenny, F. M. Romero, R. Ziessel, *J. Org. Chem.* **1997**, *62*, 1491.

[2] This procedure results in a very fast dimerisation. See also: A. Godt, C. Franzen, S. Veit, V. Enkelmann, M. Pannier, G. Jeschke, *J. Org. Chem.* **2000**, *65*, 7575.

[3] For related compounds see e. g. A. Khatyr, R. Ziessel, *J. Org. Chem.* **2000**, *65*, 3126.

[4] H. Kukula, S. Veit, A. Godt, *Eur. J. Org. Chem.* **1999**, 277.
